# Supplementary material for: A ROS-responsive biomimetic nano-platform for enhanced chemo-photodynamic-immunotherapy efficacy
Source: Royal Society of Chemistry journal article supplement (doi:10.1039/d2bm01291j), 2022-01-01
Supplement: d2bm01291j1.pdf [file d2bm01291j1.pdf]

## *Supporting Information*

### **The ROS-responsive biomimetic nano-platform for enhanced chemophotodynamic-immunotherapy efficacy**

Huixian Yan, Yanan Zhang, Yu Zhang, Yingying Li, Xinru Kong, Dongzhu Liu, Jin Li, Yanwei Xi, Jianbo Ji, Lei Ye\*, Guangxi Zhai\*

*Department of Pharmaceutics, Key Laboratory of Chemical Biology (Ministry of Education), School of Pharmaceutical Sciences, Shandong University, Jinan, 250012, P. R. China*

\* Corresponding author:

E-mail address: [professorgxzhai@126.com](mailto:professorgxzhai@126.com), [zbwye@tju.edu.cn](mailto:zbwye@tju.edu.cn)

DGL-G3

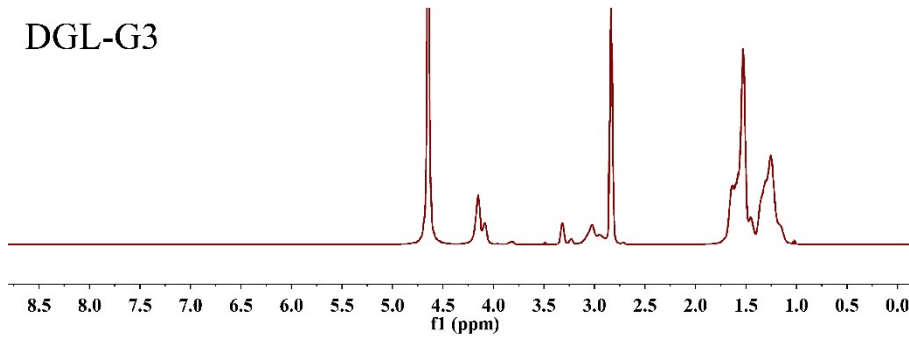

Figure S1. The <sup>1</sup>H-NMR spectra of DGL-G3.

DGL-DTX

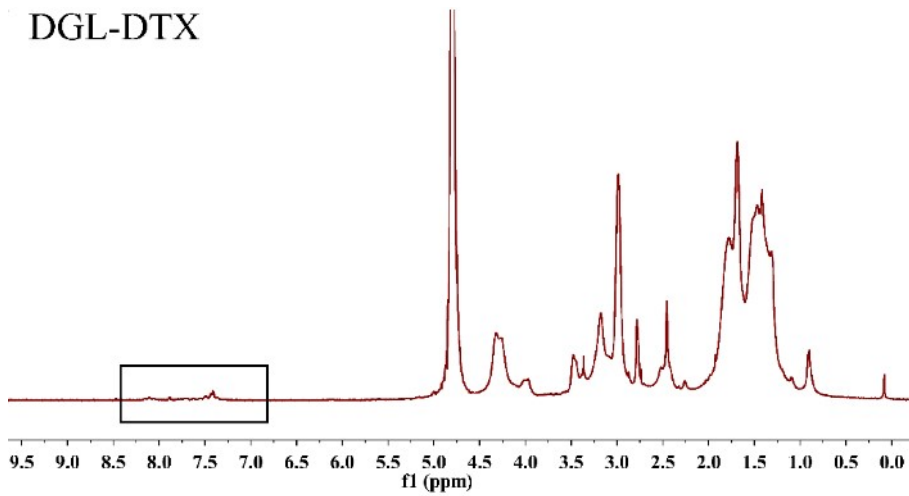

Figure S2. The <sup>1</sup>H-NMR spectra of DGL-DTX.

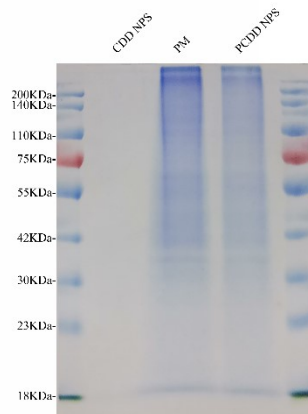

Figure S3. SDS-PAGE analysis of PCDD nanoparticles.

Table S1. Determination of hydration particle size and potential

|      | Z-Average/nm | PDI         | Zeta/mV     |
|------|--------------|-------------|-------------|
| CDD  | 79.38±0.7697 | 0.234±0.005 | +14.9±2.31  |
| PCDD | 252.9±4.937  | 0.187±0.006 | -20.8±0.153 |
| PM   | —            | —           | -24.4±0.964 |

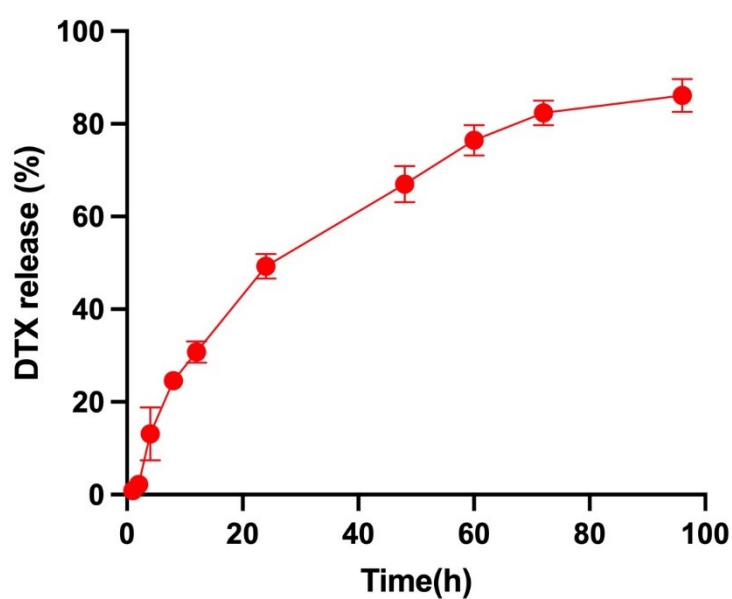

Figure S4 The drug release curve of DGL-DTX pro-drug at pH 7.4 PBS buffer.

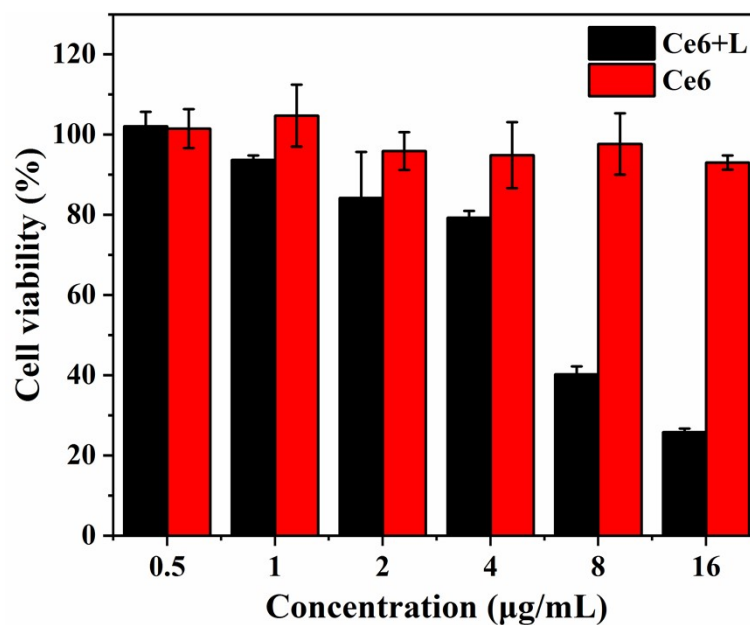

Figure S5. Cytotoxicity of Ce6 and Ce6+L

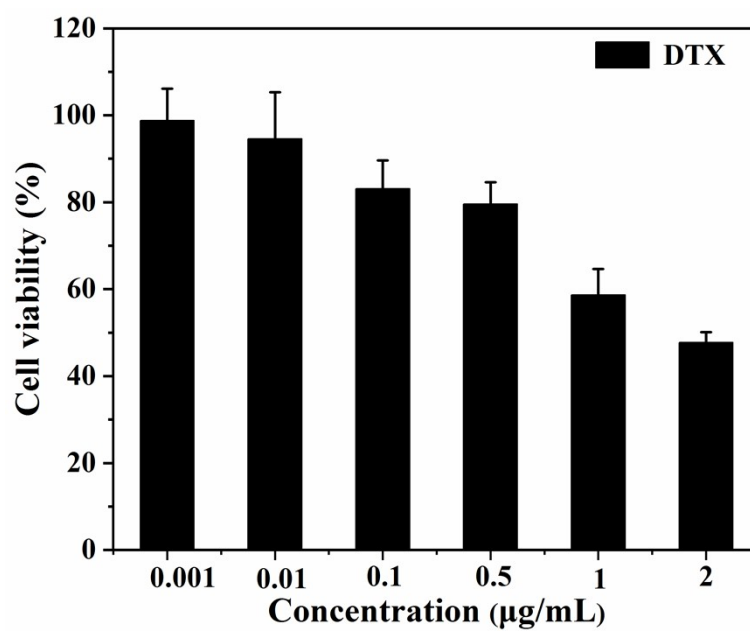

Figure S6. Cytotoxicity of DTX.

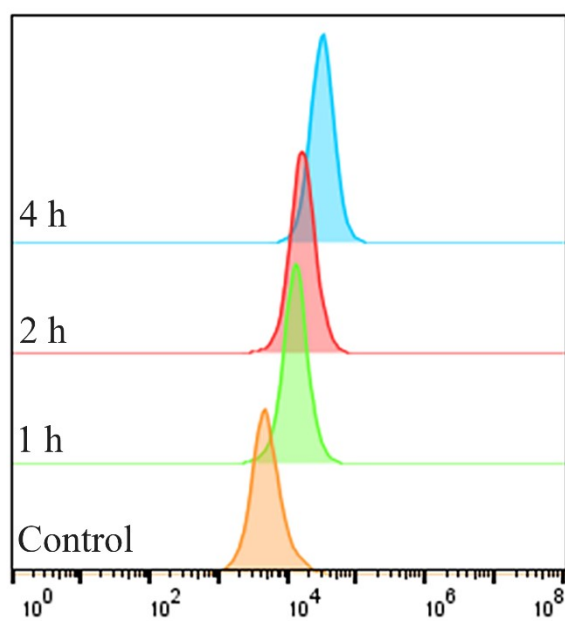

Figure S7. Flow cytometry of cell uptake of PCDD nanoparticles

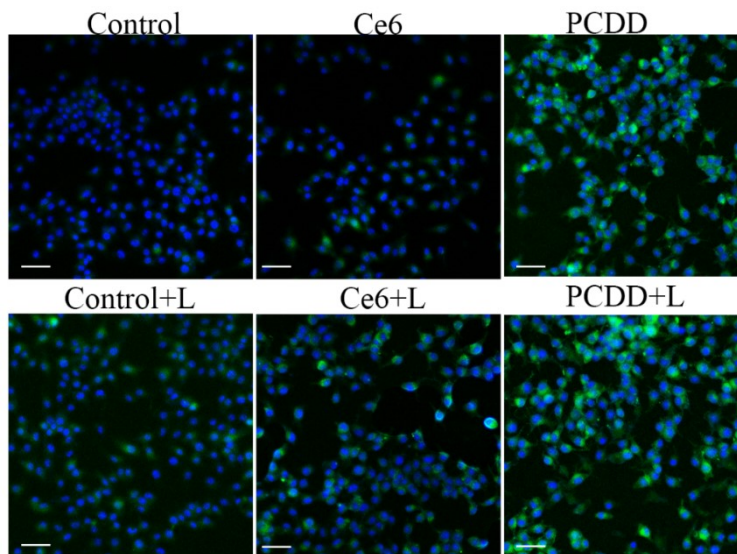

Figure S8. Determination of intracellular reactive oxygen species in B16F10 cells, scale bar, 30  $\mu$ m.

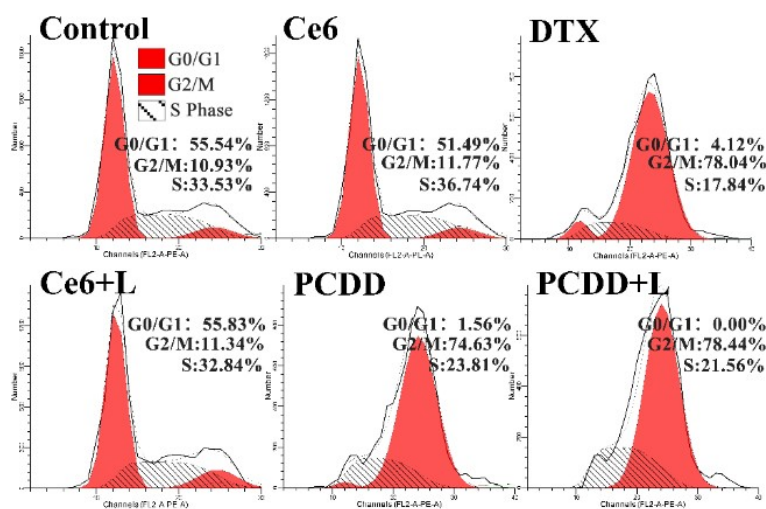

Figure S9. Cell cycle fitting curve.

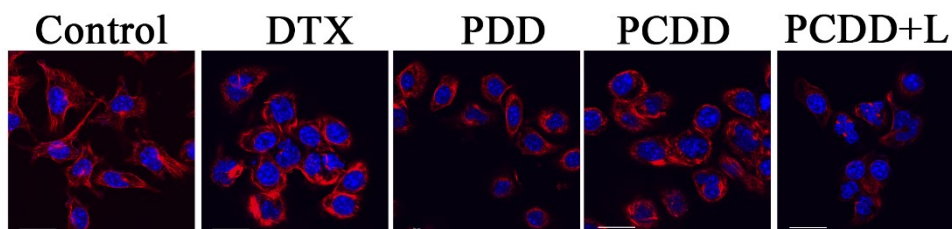

Figure S10. Changes in microtubule morphology of B16F10 cells, scale bar, 30  $\mu$ m.

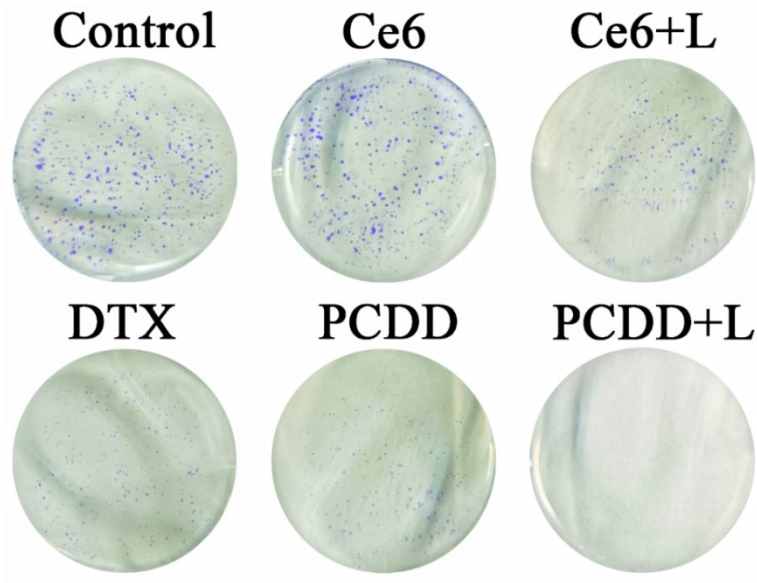

Figure S11. Colony formation in different groups.

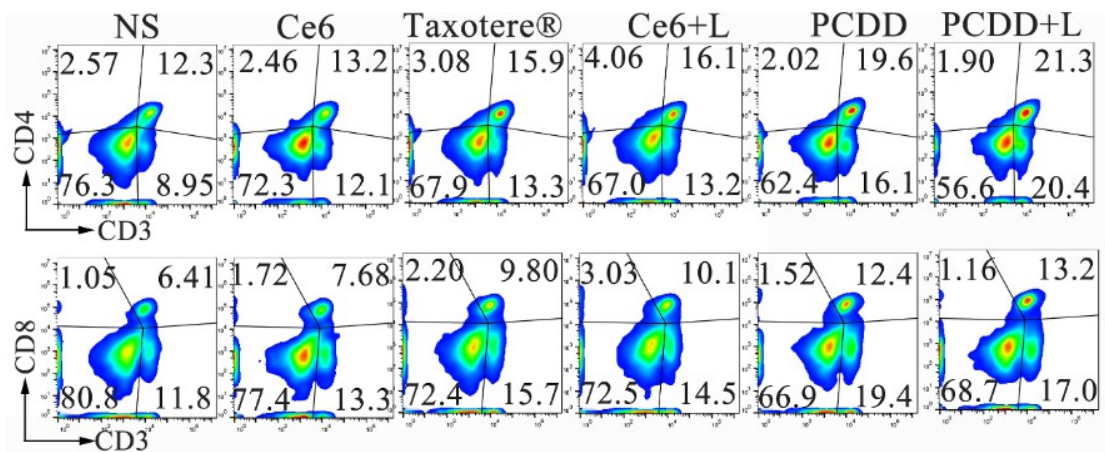

Figure S12. Flow cytometry results of Ths and CTLs of spleen in distant tumor model mice after different treatments.
